# Supplementary material for: Development of Biocompatible Ga2(HPO4)3 Nanoparticles as an Antimicrobial Agent with Improved Ga Resistance Development Profile against Pseudomonas aeruginosa
Source: Antibiotics (Basel). 2023 Oct 30;12(11):1578. doi: 10.3390/antibiotics12111578 (PMC10668710; doi:10.3390/antibiotics12111578)
Supplement: Supplementary file 1 [file antibiotics-12-01578-s001.zip › antibiotics-2510225-supplementary.pdf]

## Supplementary Information

Article

# Development of Biocompatible $\text{Ga}_2(\text{HPO}_4)_3$ Nanoparticles as an Antimicrobial Agent with Improved Ga Resistance Development Profile against *Pseudomonas aeruginosa*

Huda Alamri <sup>1,2,\*</sup>, Guanyu Chen <sup>1</sup> and Songping D. Huang <sup>1,\*</sup>

<sup>1</sup> Department of Chemistry and Biochemistry, Kent State University, Kent, OH 44240, USA; gchen10@kent.edu

<sup>2</sup> Department of Chemistry, College of Science, University of Jeddah, Jeddah 21589, Saudi Arabia

\* Correspondence: halamri@uj.edu.sa (H.A.); shuang1@kent.edu (S.D.H.)

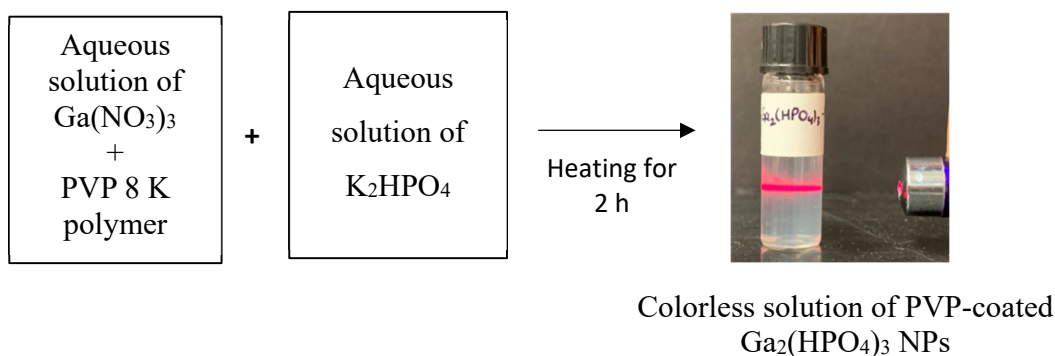

**Figure S1.** Schematic of the synthesis of PVP-coated  $\text{Ga}_2(\text{HPO}_4)_3$  NPs with the Tyndall effect exhibited by the product.

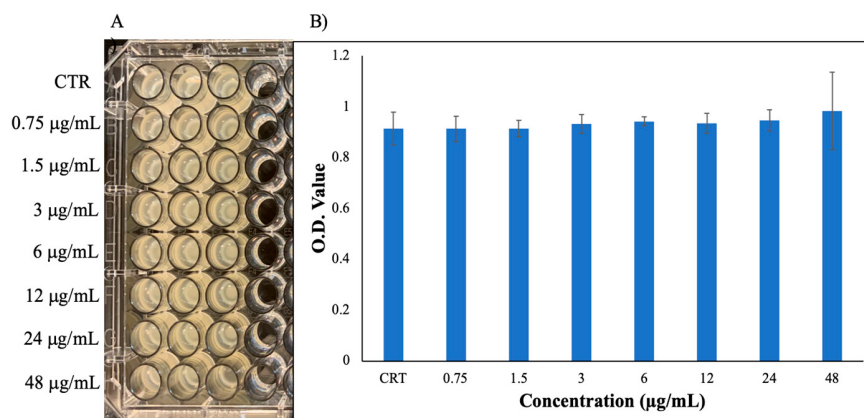

**Figure S2.** Results of the MIC determination for PVP-coated  $\text{Ga}_2(\text{HPO}_4)_3$  NPs against *S. aureus* using the broth dilution technique in the well-plate (left) and the measured optical density values of the bacteria treated with various concentrations of NPs.

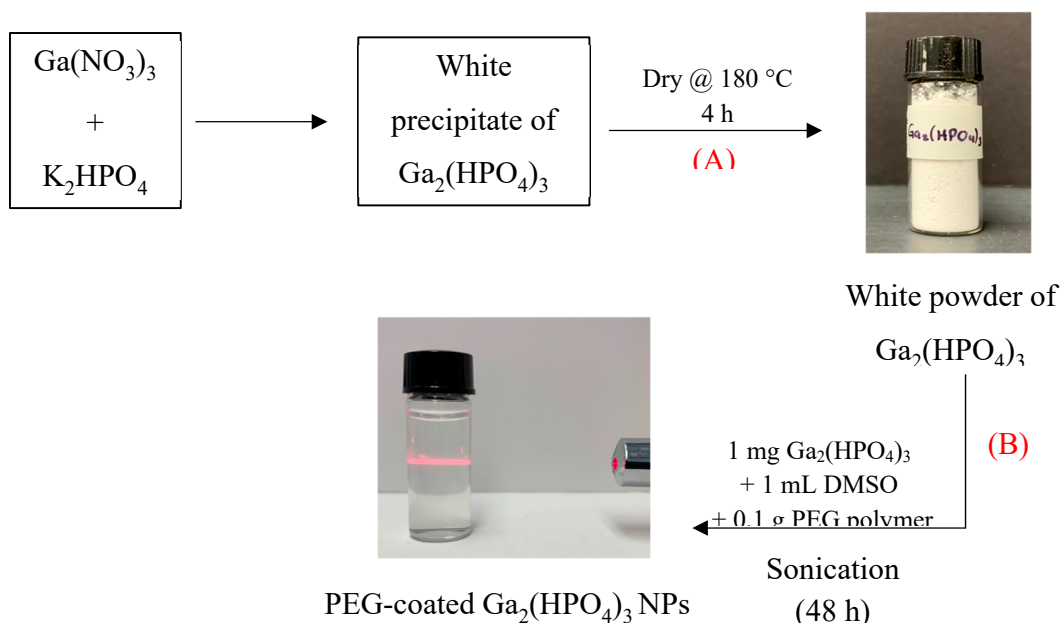

**Figure S3** Schematic of the two-step synthesis of PEG-coated  $\text{Ga}_2(\text{HPO}_4)_3$  NPs with the Tyndall effect exhibited by the product: (A) the preparation of the bulk sample and (B) the synthesis of PEG-coated  $\text{Ga}_2(\text{HPO}_4)_3$  NPs.

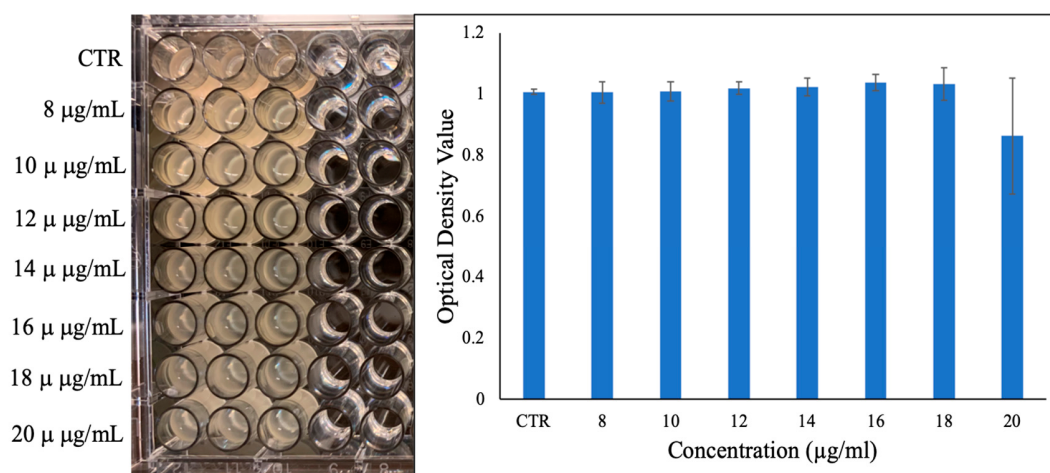

**Figure S4.** Results of the MIC determination for PEG-coated  $\text{Ga}_2(\text{HPO}_4)_3$  NPs against *S. aureus* using the broth dilution technique in the well-plate (left) and the measured optical density values of the bacteria treated with various concentrations of NPs.
